# Supplementary material for: Effects of Endurance Exercise and Vitamin D Supplementation on Insulin Resistance and Plasma Lipidome in Middle-Aged Adults with Type 2 Diabetes
Source: MDPI journal article supplement (doi:10.3390/nu15133027), 2023-07-03
Supplement: s1 [file s1]

# **Effects of endurance exercise and vitamin D supplementation on insulin resistance and plasma lipidome in middle-aged adults with type 2 diabetes**

## **Supplemental tables**

**Supplementary Table S1** The protocol of endurance exercise training

**Supplementary Table S2** Procedures of lipidomic measurement

**Supplementary Table S3** Mean differences (95% CI) of blood parameters from the pre (0-week) with each group using 2×2 factorial ANOVA

**Supplementary Table S4** Mean differences of glycemic control indicators at three time point with each group

**Supplementary Table S5** The 105 lipids that had pronounced changes between t2 and t1 sampling in VD, EX, or EX+VD and their corresponding module colors of WGCNA

**Supplementary Table S6** Different co-expression modules of lipids from WGCNA

**Table S1.** The protocol of endurance exercise training

| Stage     | HRmax (%) | RPE   | Time                                                          |
|-----------|-----------|-------|---------------------------------------------------------------|
| Week 1    | 65-70%    | 11-13 | 60 min (including 5 min warm up, and 5 min recovery exercise) |
| Week 2-4  | 70-75%    | 11-13 | 60 min (including 5 min warm up, and 5 min recovery exercise) |
| Week 5-8  | 75-80%    | 12-13 | 60 min (including 5 min warm up, and 5 min recovery exercise) |
| Week 9-12 | 80%       | 13    | 60 min (including 5 min warm up, and 5 min recovery exercise) |

Note: HRmax, Maximum heart rate; RPE, Rating of perceived exertion.

**Table S2.** Procedures of lipidomic measurement

|                                                                                                                                                                                                                                                                                                                                                                                                                                                                                                                                                                                                                                                                                                                                                                                                                                      |
|--------------------------------------------------------------------------------------------------------------------------------------------------------------------------------------------------------------------------------------------------------------------------------------------------------------------------------------------------------------------------------------------------------------------------------------------------------------------------------------------------------------------------------------------------------------------------------------------------------------------------------------------------------------------------------------------------------------------------------------------------------------------------------------------------------------------------------------|
| <b>1) Sample preparation</b>                                                                                                                                                                                                                                                                                                                                                                                                                                                                                                                                                                                                                                                                                                                                                                                                         |
| A total of 100 $\mu$ L plasma samples was properly mixed with 800 $\mu$ L cold methyl tert-butyl ether, followed by adding 240 $\mu$ L methanol. The mixture was vortexed for 30 seconds, sonicated at 4°C for 20 min and was centrifuged (14000 g for 15 minutes at 10 °C). The upper organic layer containing lipids was then dried in a vacuum centrifuge for instrumental analyses.                                                                                                                                                                                                                                                                                                                                                                                                                                              |
| <b>2) Lipid extraction</b>                                                                                                                                                                                                                                                                                                                                                                                                                                                                                                                                                                                                                                                                                                                                                                                                           |
| The lipid extracts were resuspended in 200 $\mu$ L isopropanol acetonitrile 9:1 (v/v). Chromatographic separation of 1 $\mu$ L of the extracted lipids was performed on ultra-high-performance liquid chromatography system LC-30A (Nexera). Analyses were conducted by Shanghai Applied Protein Technology Co., Ltd. In brief, lipids were separated on a Waters ACQUITY PREMIER CSH C18 Column (1.7 $\mu$ m, 2.1*100 mm), under the following chromatographic conditions: mobile phase A (acetonitrile: water = 6:4, v/v) and mobile phase B (acetonitrile: isopropanol = 1:9, v/v) at a flow rate of 300 $\mu$ L/min; column oven temperature at 45°C; gradients started with 30% of B for 2 min, then increased to 100% of B over 23 min. The gradient was returned to 30% B over 1 min, and was finally equilibrated for 9 min. |
| <b>3) Mass detection</b>                                                                                                                                                                                                                                                                                                                                                                                                                                                                                                                                                                                                                                                                                                                                                                                                             |
| The mass detection was performed using a Thermo Scientific™ Q Exactive mass spectrometer mass spectrometer, equipped with a jet stream electrospray ionization. Data were acquired in both positive and negative ion modes, respectively. Data-dependent acquisition method was used for MS/MS analyses of lipidome. Specifically, 10 MS2 scans were collected after each MS1 full scan. The resolution of MS1 is 70000 at m/z 200. The resolution of MS2 is 17500 at m/z 200. The ESI conditions are: Heater Temp 300 °C, Sheath Gas Flow rate 45 arb, Aux Gas Flow Rate 15 arb, Sweep Gas Flow Rate 1arb, spray voltage 3.0KV, Capillary Temp 350 °C, S-Lens RF Level 50%, MS1 scan ranges: 200-1800.                                                                                                                              |
| <b>4) Quality control</b>                                                                                                                                                                                                                                                                                                                                                                                                                                                                                                                                                                                                                                                                                                                                                                                                            |
| The quality control was performed throughout the dataset by including blanks, pure standard samples, extracted standard samples, and pooled plasma samples from this study. Lipidsearch 4.0 software was used for peak detection and lipids annotation. Main parameters are as follows: precursor tolerance 5 ppm, product tolerance 5 ppm, product ion threshold 5%. For the lipid species, fatty acyl chains were abbreviated Cx:y, where x represents the number of carbon atoms and y the number of double bonds of the fatty acyl chain.                                                                                                                                                                                                                                                                                        |

**Table S3.** Mean differences (95% CI) of blood parameters from the pre (0-week) with each group using 2×2 factorial ANOVA

| Variables                           | EX + VD                 | VD                      | EX                       | Con                      | Vitamin D effect |                  | Exercise effect |                  | Interaction effect |                  |
|-------------------------------------|-------------------------|-------------------------|--------------------------|--------------------------|------------------|------------------|-----------------|------------------|--------------------|------------------|
|                                     | N=15                    | N=15                    | N=14                     | N=15                     | P                | Partial $\eta^2$ | P               | Partial $\eta^2$ | P                  | Partial $\eta^2$ |
| Δ Total body fat (%) <sup>a</sup>   | -1.0 (-2.1, 0.2)        | 0.4 (-0.7, 1.6)         | <b>-1.1 (-2.0, -0.2)</b> | -0.5 (-1.2, 0.2)         | 0.262            | 0.024            | <b>0.032</b>    | 0.084            | 0.428              | 0.012            |
| Δ Apolipoprotein A (g/L)            | 0.02 (-0.10, 0.15)      | 0.03 (-0.07, 0.12)      | 0.01 (-0.06, 0.07)       | 0.09 (-0.02, 0.21)       | 0.582            | 0.004            | 0.349           | 0.009            | 0.400              | 0.010            |
| Δ Apolipoprotein B (g/L)            | 0.02 (-0.07, 0.12)      | -0.02 (-0.10, 0.06)     | 0.03 (-0.06, 0.12)       | 0.07 (-0.01, 0.14)       | 0.232            | 0.020            | 0.986           | 0.000            | 0.327              | 0.013            |
| Δ Low density lipoprotein (mmol/L)  | -0.09 (-0.43, 0.25)     | -0.25 (-0.57, 0.06)     | -0.26 (-0.54, 0.01)      | -0.09 (-0.23, 0.05)      | 0.969            | 0.000            | 0.977           | 0.000            | 0.203              | 0.026            |
| Δ High density lipoprotein (mmol/L) | 0.06 (-0.05, 0.17)      | 0.00 (-0.12, 0.13)      | 0.01 (-0.12, 0.15)       | -0.01 (-0.12, 0.10)      | 0.563            | 0.009            | 0.455           | 0.018            | 0.777              | 0.000            |
| Δ Cholesterol (mmol/L)              | 0.06 (-0.39, 0.51)      | -0.19 (-0.29, 0.29)     | -0.19 (-0.50, 0.12)      | -0.07 (-0.31, 0.16)      | 0.699            | 0.005            | 0.691           | 0.004            | 0.281              | 0.015            |
| Δ Triglyceride (mmol/L)             | -0.04 (-0.26, 0.18)     | -0.00 (-0.34, 0.33)     | -0.24 (-0.66, 0.18)      | 0.32 (0.04, 0.59)        | 0.698            | 0.015            | 0.050           | 0.048            | 0.085              | 0.089            |
| Δ HbA1c (%)                         | -0.8 (-1.6, 0.1)        | -0.3 (-1.0, 0.3)        | -0.2 (-0.5, 0.2)         | -0.5 (-1.3, 0.3)         | 0.506            | 0.023            | 0.820           | 0.002            | 0.229              | 0.014            |
| Δ Fasting blood glucose (mmol/L)    | -0.9 (-1.6, -0.2)       | -0.9 (-1.8, -0.1)       | -0.6 (-1.3, 0.2)         | 0.4 (-1.8, 1.1)          | 0.337            | 0.086            | 0.884           | 0.010            | 0.798              | 0.033            |
| Δ Fasting insulin (μU/mL)           | -1.8 (-6.1, 2.5)        | 1.3 (-1.3, 4.0)         | 0.5 (-3.8, 4.8)          | 0.5 (-3.6, 4.5)          | 0.806            | 0.004            | 0.342           | 0.023            | 0.594              | 0.012            |
| Δ HOMA-IR                           | -0.9 (-2.4, 0.5)        | -0.2 (-1.1, 0.7)        | -0.2 (-1.6, 1.3)         | 0.2 (-1.8, 2.3)          | 0.447            | 0.026            | 0.273           | 0.027            | 0.754              | 0.000            |
| Δ Glucose AUC <sup>b</sup>          | -78.1 (-225.8, 69.6)    | -140.1 (-307.2, 27.0)   | -75.9 (-201.7, 49.9)     | 36.1 (-112.0, 184.2)     | 0.197            | 0.032            | 0.716           | 0.003            | 0.208              | 0.031            |
| Δ Insulin AUC <sup>b</sup>          | 515.8 (-1106.7, 2138.2) | 1018.1 (-128.1, 2164.3) | 1205.9 (-161.9, 2249.9)  | -149.1 (-1979.0, 1680.9) | 0.724            | 0.002            | 0.529           | 0.008            | 0.173              | 0.036            |

Δ, changes from the endpoint to the pre; EX+VD, vitamin D supplementation and exercise training; VD, vitamin D supplementation; EX, exercise training; Con, control group; HOMA-IR, homeostasis model assessment of insulin resistance; HbA1c, glycated hemoglobin; AUC, area under the curves during oral glucose tolerance test; CI, confidence interval. <sup>a</sup>, n=14 in VD and Con; <sup>b</sup>, n=13 in VD and Con were included.

**Table S4.** Mean differences of glycemic control indicators at three time point with each group

| Variable           | HbA1c (%)     | Fasting glucose (mmol/L) | Fasting insulin ( $\mu$ U/mL) | HOMA-IR       |
|--------------------|---------------|--------------------------|-------------------------------|---------------|
| EX+VD              |               |                          |                               |               |
| t1                 | 7.0 $\pm$ 1.9 | 6.7 $\pm$ 1.4            | 12.6 $\pm$ 8.6                | 3.9 $\pm$ 3.0 |
| t2                 | 6.3 $\pm$ 0.7 | 5.9 $\pm$ 1.0            | 10.8 $\pm$ 6.2                | 3.0 $\pm$ 2.2 |
| t3                 | 6.3 $\pm$ 0.9 | 6.2 $\pm$ 1.3            | 10.6 $\pm$ 6.0                | 3.0 $\pm$ 2.0 |
| P <sub>t1-t2</sub> | 0.064         | <b>0.016</b>             | 0.389                         | 0.086         |
| P <sub>t2-t3</sub> | 0.200         | 0.123                    | 0.430                         | 0.222         |
| P <sub>t1-t3</sub> | 0.067         | 0.250                    | 0.737                         | 0.549         |
| EX                 |               |                          |                               |               |
| t1                 | 6.7 $\pm$ 1.2 | 7.8 $\pm$ 2.1            | 11.7 $\pm$ 6.1                | 3.9 $\pm$ 2.3 |
| t2                 | 6.5 $\pm$ 1.1 | 7.2 $\pm$ 2.1            | 12.1 $\pm$ 8.3                | 3.8 $\pm$ 2.3 |
| t3                 | 6.6 $\pm$ 1.1 | 7.6 $\pm$ 2.9            | 10.4 $\pm$ 5.3                | 3.4 $\pm$ 1.8 |
| P <sub>t1-t2</sub> | 0.316         | 0.114                    | 0.809                         | 0.823         |
| P <sub>t2-t3</sub> | 0.083         | 0.365                    | 0.483                         | 0.288         |
| P <sub>t1-t3</sub> | 0.457         | 0.722                    | 0.391                         | 0.511         |
| VD                 |               |                          |                               |               |
| t1                 | 6.9 $\pm$ 1.4 | 7.4 $\pm$ 1.9            | 9.7 $\pm$ 5.6                 | 3.4 $\pm$ 2.6 |
| t2                 | 6.6 $\pm$ 0.8 | 6.5 $\pm$ 0.8            | 11.0 $\pm$ 8.9                | 3.2 $\pm$ 2.7 |
| t3                 | 6.8 $\pm$ 1.1 | 7.2 $\pm$ 1.8            | 12.7 $\pm$ 10.1               | 4.5 $\pm$ 4.6 |
| P <sub>t1-t2</sub> | 0.318         | <b>0.032</b>             | 0.294                         | 0.649         |
| P <sub>t2-t3</sub> | 0.471         | 0.223                    | 0.248                         | 0.183         |
| P <sub>t1-t3</sub> | 0.538         | 0.217                    | 0.083                         | 0.205         |
| Con                |               |                          |                               |               |
| t1                 | 7.2 $\pm$ 1.6 | 7.5 $\pm$ 2.6            | 14.7 $\pm$ 7.6                | 4.9 $\pm$ 2.6 |
| t2                 | 6.7 $\pm$ 0.8 | 7.1 $\pm$ 1.3            | 15.1 $\pm$ 11.0               | 5.1 $\pm$ 4.9 |
| t3                 | 6.7 $\pm$ 0.6 | 7.1 $\pm$ 1.1            | 15.8 $\pm$ 7.7                | 5.1 $\pm$ 2.9 |
| P <sub>t1-t2</sub> | 0.186         | 0.588                    | 0.813                         | 0.814         |
| P <sub>t2-t3</sub> | 0.968         | 0.649                    | 0.993                         | 0.759         |
| P <sub>t1-t3</sub> | 0.354         | 0.966                    | 0.276                         | 0.432         |

Data are mean  $\pm$  standard deviation (SD). EX+VD, vitamin D supplementation and exercise training; VD, vitamin D supplementation; EX, exercise training; Con, control group; HbA1c, glycated hemoglobin; HOMA-IR, homeostasis model assessment of insulin resistance; P<sub>t1-t2</sub>, comparisons between baseline and endpoint with each group were assessed using paired t-test; P<sub>t2-t3</sub>, comparisons between endpoint and flow-up with each group were assessed using paired t-test; P<sub>t1-t3</sub>, comparisons between baseline and flow-up with each group were assessed using paired t-test. t1 and t2: EX+VD, n=15; EX, n=14; VD, n=15; Con, n=15; t3: EX+VD, n=13; EX, n=12; VD, n=11; Con, n=12.

**Table S5.** The 105 lipids that had pronounced changes between t2 and t1 sampling in VD, EX, or EX+VD and their corresponding module colors of WGCNA

[illegible]

[illegible]

[illegible]



|                    |               |     |      |        |        |       |        |        |        |        |        |        |        |        |        |
|--------------------|---------------|-----|------|--------|--------|-------|--------|--------|--------|--------|--------|--------|--------|--------|--------|
| LPE(18:1e)+Na      | LPE(18:1e)+Na | LPE | blue | 1.3e+0 | 7.5e+0 | 1.2e+ | 1.2e+0 | 1.2e+0 | 1.2e+0 | 1.3e+0 | 1.1e+0 | 6.4e+0 | 6.3e+0 | 8.1e+0 | 1.6e+0 |
|                    |               |     |      | 7      | 6      | 07    | 7      | 7      | 7      | 7      | 7      | 6      | 6      | 6      | 7      |
|                    |               |     |      | 1.2e+0 | 8.7e+0 | 1.2e+ | 9.9e+0 | 1.2e+0 | 9.0e+0 | 1.2e+0 | 1.1e+0 | 9.4e+0 | 8.8e+0 | 1.0e+0 | 1.3e+0 |
|                    |               |     |      | 6 ±    | 5 ±    | 06 ±  | 5 ±    | 6 ±    | 5 ±    | 6 ±    | 6 ±    | 5 ±    | 5 ±    | 6 ±    | 6 ±    |
|                    |               |     |      | 6.8e+0 | 6.6e+0 | 6.1e+ | 6.0e+0 | 7.3e+0 | 4.5e+0 | 5.9e+0 | 7.3e+0 | 4.3e+0 | 5.4e+0 | 5.8e+0 | 9.3e+0 |
|                    |               |     |      | 5      | 5      | 05    | 5      | 5      | 5      | 5      | 5      | 5      | 5      | 5      | 5      |
| PI(18:3_18:2)+Na   | PI(36:5)+Na   | PI  | blue | 4.9e+0 | 4.4e+0 | 4.7e+ | 3.9e+0 | 4.8e+0 | 4.5e+0 | 4.3e+0 | 4.3e+0 | 4.7e+0 | 4.4e+0 | 4.8e+0 | 5.1e+0 |
|                    |               |     |      | 6 ±    | 6 ±    | 06 ±  | 6 ±    | 6 ±    | 6 ±    | 6 ±    | 6 ±    | 6 ±    | 6 ±    | 6 ±    | 6 ±    |
|                    |               |     |      | 1.4e+0 | 1.3e+0 | 1.7e+ | 1.6e+0 | 2.3e+0 | 1.4e+0 | 1.4e+0 | 1.3e+0 | 1.4e+0 | 1.3e+0 | 1.6e+0 | 1.8e+0 |
|                    |               |     |      | 6      | 6      | 06    | 6      | 6      | 6      | 6      | 6      | 6      | 6      | 6      | 6      |
|                    |               |     |      | 7.9e+0 | 4.1e+0 | 8.7e+ | 4.7e+0 | 7.3e+0 | 4.5e+0 | 8.6e+0 | 6.5e+0 | 4.6e+0 | 3.5e+0 | 5.6e+0 | 7.9e+0 |
|                    |               |     |      | 5 ±    | 5 ±    | 05 ±  | 5 ±    | 5 ±    | 5 ±    | 5 ±    | 5 ±    | 5 ±    | 5 ±    | 5 ±    | 5 ±    |
| LPC(18:1e)+Na      | LPC(18:1e)+Na | LPC | blue | 7.8e+0 | 3.2e+0 | 8.6e+ | 3.8e+0 | 7.6e+0 | 4.5e+0 | 9.5e+0 | 5.8e+0 | 3.0e+0 | 2.6e+0 | 5.3e+0 | 7.6e+0 |
|                    |               |     |      | 5      | 5      | 05    | 5      | 5      | 5      | 5      | 5      | 5      | 5      | 5      | 5      |
|                    |               |     |      | 3.0e+0 | 2.6e+0 | 3.7e+ | 3.2e+0 | 2.9e+0 | 3.4e+0 | 3.7e+0 | 3.4e+0 | 2.5e+0 | 2.5e+0 | 3.1e+0 | 3.8e+0 |
|                    |               |     |      | 7 ±    | 7 ±    | 07 ±  | 7 ±    | 7 ±    | 7 ±    | 7 ±    | 7 ±    | 7 ±    | 7 ±    | 7 ±    | 7 ±    |
|                    |               |     |      | 1.6e+0 | 1.1e+0 | 1.8e+ | 1.8e+0 | 1.2e+0 | 2.4e+0 | 1.8e+0 | 1.9e+0 | 1.6e+0 | 1.3e+0 | 1.2e+0 | 2.1e+0 |
|                    |               |     |      | 7      | 7      | 07    | 7      | 7      | 7      | 7      | 7      | 7      | 7      | 7      | 7      |
| LPC(18:0)-CH3      | LPC(18:0)-CH3 | LPC | blue | 6.4e+0 | 5.1e+0 | 8.6e+ | 6.3e+0 | 6.0e+0 | 5.7e+0 | 8.9e+0 | 7.2e+0 | 4.6e+0 | 4.9e+0 | 6.7e+0 | 7.0e+0 |
|                    |               |     |      | 5 ±    | 5 ±    | 05 ±  | 5 ±    | 5 ±    | 5 ±    | 5 ±    | 5 ±    | 5 ±    | 5 ±    | 5 ±    | 5 ±    |
|                    |               |     |      | 3.8e+0 | 2.6e+0 | 4.6e+ | 3.2e+0 | 2.8e+0 | 3.7e+0 | 4.8e+0 | 4.0e+0 | 2.2e+0 | 2.6e+0 | 2.9e+0 | 3.7e+0 |
|                    |               |     |      | 5      | 5      | 05    | 5      | 5      | 5      | 5      | 5      | 5      | 5      | 5      | 5      |
|                    |               |     |      | 4.1e+0 | 3.6e+0 | 4.0e+ | 3.3e+0 | 4.0e+0 | 3.6e+0 | 3.7e+0 | 3.8e+0 | 3.9e+0 | 3.6e+0 | 4.3e+0 | 4.4e+0 |
|                    |               |     |      | 6 ±    | 6 ±    | 06 ±  | 6 ±    | 6 ±    | 6 ±    | 6 ±    | 6 ±    | 6 ±    | 6 ±    | 6 ±    | 6 ±    |
| PIP(18:3e_22:6)-H  | PIP(40:9e)-H  | PIP | blue | 1.2e+0 | 1.1e+0 | 1.2e+ | 1.4e+0 | 1.7e+0 | 1.5e+0 | 1.2e+0 | 1.3e+0 | 1.5e+0 | 1.2e+0 | 1.5e+0 | 1.6e+0 |
|                    |               |     |      | 6      | 6      | 06    | 6      | 6      | 6      | 6      | 6      | 6      | 6      | 6      | 6      |
|                    |               |     |      | 3.8e+0 | 2.3e+0 | 3.1e+ | 2.9e+0 | 3.9e+0 | 2.6e+0 | 3.0e+0 | 3.0e+0 | 3.6e+0 | 1.6e+0 | 3.9e+0 | 3.4e+0 |
|                    |               |     |      | 6 ±    | 6 ±    | 06 ±  | 6 ±    | 6 ±    | 6 ±    | 6 ±    | 6 ±    | 6 ±    | 6 ±    | 6 ±    | 6 ±    |
|                    |               |     |      | 3.4e+0 | 1.2e+0 | 2.3e+ | 2.2e+0 | 3.1e+0 | 2.0e+0 | 2.4e+0 | 2.3e+0 | 2.6e+0 | 6.4e+0 | 2.3e+0 | 2.5e+0 |
|                    |               |     |      | 6      | 6      | 06    | 6      | 6      | 6      | 6      | 6      | 6      | 5      | 6      | 6      |
| PC(14:0_22:6)+HCOO | PC(36:6)+HCOO | PC  | blue | 7.0e+0 | 7.0e+0 | 6.6e+ | 5.9e+0 | 7.0e+0 | 5.9e+0 | 7.3e+0 | 5.3e+0 | 6.8e+0 | 5.5e+0 | 8.6e+0 | 8.1e+0 |
|                    |               |     |      | 6 ±    | 6 ±    | 06 ±  | 6 ±    | 6 ±    | 6 ±    | 6 ±    | 6 ±    | 6 ±    | 6 ±    | 6 ±    | 6 ±    |

|                      |               |       |      |        |        |       |        |        |        |        |        |        |        |        |        |
|----------------------|---------------|-------|------|--------|--------|-------|--------|--------|--------|--------|--------|--------|--------|--------|--------|
| PC(16:0_18:1)+HCOO   | PC(34:1)+HCOO | PC    | blue | 6.0e+0 | 6.4e+0 | 4.6e+ | 3.8e+0 | 4.3e+0 | 4.5e+0 | 5.7e+0 | 4.0e+0 | 5.2e+0 | 3.8e+0 | 8.2e+0 | 6.1e+0 |
|                      |               |       |      | 6      | 6      | 06    | 6      | 6      | 6      | 6      | 6      | 6      | 6      | 6      | 6      |
|                      |               |       |      | 2.3e+0 | 1.9e+0 | 2.0e+ | 2.1e+0 | 2.4e+0 | 1.8e+0 | 2.4e+0 | 1.8e+0 | 2.1e+0 | 1.9e+0 | 2.5e+0 | 2.5e+0 |
|                      |               |       |      | 8 ±    | 8 ±    | 08 ±  | 8 ±    | 8 ±    | 8 ±    | 8 ±    | 8 ±    | 8 ±    | 8 ±    | 8 ±    | 8 ±    |
|                      |               |       |      | 8.6e+0 | 8.3e+0 | 7.5e+ | 8.7e+0 | 8.5e+0 | 8.5e+0 | 1.2e+0 | 4.8e+0 | 7.5e+0 | 6.2e+0 | 9.8e+0 | 1.1e+0 |
|                      |               |       |      | 7      | 7      | 07    | 7      | 7      | 7      | 8      | 7      | 7      | 7      | 7      | 7      |
| TG(18:0_18:2_20:5)+H | TG(56:7)+H    | TG    | grey | 1.6e+0 | 1.0e+0 | 1.3e+ | 1.1e+0 | 1.6e+0 | 1.9e+0 | 1.9e+0 | 2.2e+0 | 1.6e+0 | 1.0e+0 | 3.4e+0 | 1.6e+0 |
|                      |               |       |      | 7 ±    | 7 ±    | 07 ±  | 7 ±    | 7 ±    | 7 ±    | 7 ±    | 7 ±    | 7 ±    | 7 ±    | 7 ±    | 7 ±    |
|                      |               |       |      | 1.6e+0 | 8.1e+0 | 1.2e+ | 1.0e+0 | 1.4e+0 | 2.5e+0 | 2.9e+0 | 2.6e+0 | 1.6e+0 | 8.5e+0 | 4.5e+0 | 1.4e+0 |
|                      |               |       |      | 7      | 6      | 07    | 7      | 7      | 7      | 7      | 7      | 7      | 6      | 7      | 7      |
| OAHFA(47:6)-H        | OAHFA(47:6)-H | OAHFA | grey | 1.6e+0 | 1.7e+0 | 1.6e+ | 1.5e+0 | 1.6e+0 | 1.7e+0 | 1.7e+0 | 1.7e+0 | 1.5e+0 | 1.6e+0 | 1.5e+0 | 1.7e+0 |
|                      |               |       |      | 6 ±    | 6 ±    | 06 ±  | 6 ±    | 6 ±    | 6 ±    | 6 ±    | 6 ±    | 6 ±    | 6 ±    | 6 ±    | 6 ±    |
|                      |               |       |      | 4.9e+0 | 6.0e+0 | 6.3e+ | 4.2e+0 | 5.0e+0 | 8.2e+0 | 7.8e+0 | 6.6e+0 | 2.5e+0 | 6.7e+0 | 4.1e+0 | 7.0e+0 |
|                      |               |       |      | 5      | 5      | 05    | 5      | 5      | 5      | 5      | 5      | 5      | 5      | 5      | 5      |
| PE(37:3e)+Na         | PE(37:3e)+Na  | PE    | grey | 5.8e+0 | 1.8e+0 | 2.9e+ | 1.9e+0 | 3.7e+0 | 2.2e+0 | 3.4e+0 | 2.0e+0 | 3.2e+0 | 2.5e+0 | 3.1e+0 | 2.4e+0 |
|                      |               |       |      | 7 ±    | 7 ±    | 07 ±  | 7 ±    | 7 ±    | 7 ±    | 7 ±    | 7 ±    | 7 ±    | 7 ±    | 7 ±    | 7 ±    |
|                      |               |       |      | 1.2e+0 | 1.2e+0 | 2.7e+ | 1.3e+0 | 4.6e+0 | 3.8e+0 | 3.0e+0 | 1.4e+0 | 3.2e+0 | 2.3e+0 | 3.0e+0 | 1.7e+0 |
|                      |               |       |      | 8      | 7      | 07    | 7      | 7      | 7      | 7      | 7      | 7      | 7      | 7      | 7      |
| DG(26:6e)+Na         | DG(26:6e)+Na  | DG    | grey | 6.4e+0 | 6.2e+0 | 4.5e+ | 3.9e+0 | 5.1e+0 | 5.1e+0 | 3.6e+0 | 2.6e+0 | 4.5e+0 | 5.1e+0 | 6.2e+0 | 5.0e+0 |
|                      |               |       |      | 5 ±    | 5 ±    | 05 ±  | 5 ±    | 5 ±    | 5 ±    | 5 ±    | 5 ±    | 5 ±    | 5 ±    | 5 ±    | 5 ±    |
|                      |               |       |      | 6.1e+0 | 4.8e+0 | 3.8e+ | 3.3e+0 | 4.1e+0 | 4.0e+0 | 2.3e+0 | 1.6e+0 | 3.4e+0 | 3.3e+0 | 5.5e+0 | 3.8e+0 |
|                      |               |       |      | 5      | 5      | 05    | 5      | 5      | 5      | 5      | 5      | 5      | 5      | 5      | 5      |
| PA(17:0_18:2)-H      | PA(35:2)-H    | PA    | grey | 6.1e+0 | 2.8e+0 | 5.9e+ | 5.4e+0 | 6.1e+0 | 3.2e+0 | 4.3e+0 | 4.1e+0 | 5.0e+0 | 2.8e+0 | 5.1e+0 | 5.6e+0 |
|                      |               |       |      | 6 ±    | 6 ±    | 06 ±  | 6 ±    | 6 ±    | 6 ±    | 6 ±    | 6 ±    | 6 ±    | 6 ±    | 6 ±    | 6 ±    |
|                      |               |       |      | 3.7e+0 | 2.0e+0 | 3.4e+ | 3.8e+0 | 4.0e+0 | 3.5e+0 | 3.7e+0 | 4.5e+0 | 4.3e+0 | 1.9e+0 | 4.2e+0 | 6.0e+0 |
|                      |               |       |      | 6      | 6      | 06    | 6      | 6      | 6      | 6      | 6      | 6      | 6      | 6      | 6      |
| PC(22:4_21:1)+HCOO   | PC(43:5)+HCOO | PC    | grey | 8.6e+0 | 7.9e+0 | 9.9e+ | 8.2e+0 | 8.1e+0 | 6.8e+0 | 9.0e+0 | 7.9e+0 | 7.1e+0 | 6.8e+0 | 8.5e+0 | 9.1e+0 |
|                      |               |       |      | 6 ±    | 6 ±    | 06 ±  | 6 ±    | 6 ±    | 6 ±    | 6 ±    | 6 ±    | 6 ±    | 6 ±    | 6 ±    | 6 ±    |
|                      |               |       |      | 2.6e+0 | 3.9e+0 | 4.4e+ | 3.1e+0 | 3.6e+0 | 2.5e+0 | 4.0e+0 | 2.3e+0 | 1.6e+0 | 2.9e+0 | 2.7e+0 | 3.6e+0 |
|                      |               |       |      | 6      | 6      | 06    | 6      | 6      | 6      | 6      | 6      | 6      | 6      | 6      | 6      |
| SM(d18:2_16:1)+H     | SM(d34:3)+H   | SM    | grey | 3.4e+0 | 2.6e+0 | 3.4e+ | 2.8e+0 | 3.4e+0 | 2.6e+0 | 2.9e+0 | 3.2e+0 | 3.2e+0 | 2.6e+0 | 3.2e+0 | 3.8e+0 |
|                      |               |       |      | 6 ±    | 6 ±    | 06 ±  | 6 ±    | 6 ±    | 6 ±    | 6 ±    | 6 ±    | 6 ±    | 6 ±    | 6 ±    | 6 ±    |

|                           |                         |         |      |        |        |       |        |        |        |        |        |        |        |        |        |
|---------------------------|-------------------------|---------|------|--------|--------|-------|--------|--------|--------|--------|--------|--------|--------|--------|--------|
| PC(37:6)+H                | PC(37:6)+H              | PC      | grey | 2.0e+0 | 1.2e+0 | 1.9e+ | 1.4e+0 | 1.9e+0 | 1.5e+0 | 1.5e+0 | 1.6e+0 | 2.0e+0 | 8.2e+0 | 1.2e+0 | 2.1e+0 |
|                           |                         |         |      | 6      | 6      | 06    | 6      | 6      | 6      | 6      | 6      | 5      | 6      | 6      |        |
|                           |                         |         |      | 3.3e+0 | 2.3e+0 | 3.3e+ | 2.6e+0 | 3.3e+0 | 2.7e+0 | 3.1e+0 | 3.0e+0 | 3.0e+0 | 2.4e+0 | 3.7e+0 | 4.2e+0 |
|                           |                         |         |      | 7 ±    | 7 ±    | 07 ±  | 7 ±    | 7 ±    | 7 ±    | 7 ±    | 7 ±    | 7 ±    | 7 ±    | 7 ±    | 7 ±    |
|                           |                         |         |      | 3.0e+0 | 2.0e+0 | 2.9e+ | 2.0e+0 | 2.7e+0 | 3.6e+0 | 2.3e+0 | 2.4e+0 | 2.7e+0 | 1.8e+0 | 3.0e+0 | 3.9e+0 |
|                           |                         |         |      | 7      | 7      | 07    | 7      | 7      | 7      | 7      | 7      | 7      | 7      | 7      | 7      |
| LPC(15:0)+H               | LPC(15:0)+H             | LPC     | grey | 2.0e+0 | 1.7e+0 | 2.5e+ | 1.8e+0 | 2.0e+0 | 2.3e+0 | 2.5e+0 | 2.0e+0 | 1.5e+0 | 1.6e+0 | 2.1e+0 | 2.1e+0 |
|                           |                         |         |      | 7 ±    | 7 ±    | 07 ±  | 7 ±    | 7 ±    | 7 ±    | 7 ±    | 7 ±    | 7 ±    | 7 ±    | 7 ±    | 7 ±    |
|                           |                         |         |      | 1.6e+0 | 9.3e+0 | 1.6e+ | 1.3e+0 | 1.4e+0 | 1.6e+0 | 1.7e+0 | 1.4e+0 | 1.2e+0 | 8.8e+0 | 1.3e+0 | 1.5e+0 |
|                           |                         |         |      | 7      | 6      | 07    | 7      | 7      | 7      | 7      | 7      | 7      | 6      | 7      | 7      |
| TG(15:0_18:1_18:3)+N<br>a | TG(51:4)+Na             | TG      | grey | 6.2e+0 | 4.3e+0 | 5.1e+ | 5.7e+0 | 6.2e+0 | 5.5e+0 | 5.5e+0 | 6.4e+0 | 5.4e+0 | 4.5e+0 | 7.0e+0 | 7.7e+0 |
|                           |                         |         |      | 6 ±    | 6 ±    | 06 ±  | 6 ±    | 6 ±    | 6 ±    | 6 ±    | 6 ±    | 6 ±    | 6 ±    | 6 ±    | 6 ±    |
|                           |                         |         |      | 4.0e+0 | 3.2e+0 | 3.9e+ | 3.5e+0 | 4.4e+0 | 3.9e+0 | 4.1e+0 | 4.2e+0 | 4.0e+0 | 2.5e+0 | 4.5e+0 | 4.4e+0 |
|                           |                         |         |      | 6      | 6      | 06    | 6      | 6      | 6      | 6      | 6      | 6      | 6      | 6      | 6      |
| PC(18:3e_22:0)+HCO<br>O   | PC(40:3e)+HCOO          | PC      | grey | 1.7e+0 | 1.3e+0 | 1.4e+ | 1.4e+0 | 1.5e+0 | 1.2e+0 | 1.5e+0 | 1.3e+0 | 1.4e+0 | 1.0e+0 | 1.5e+0 | 1.5e+0 |
|                           |                         |         |      | 7 ±    | 7 ±    | 07 ±  | 7 ±    | 7 ±    | 7 ±    | 7 ±    | 7 ±    | 7 ±    | 7 ±    | 7 ±    | 7 ±    |
|                           |                         |         |      | 8.9e+0 | 6.3e+0 | 5.1e+ | 6.7e+0 | 7.4e+0 | 6.7e+0 | 1.0e+0 | 6.1e+0 | 6.3e+0 | 3.1e+0 | 8.3e+0 | 6.8e+0 |
|                           |                         |         |      | 6      | 6      | 06    | 6      | 6      | 6      | 7      | 6      | 6      | 6      | 6      | 6      |
| Hex2Cer(m42:7)+HCO<br>O   | Hex2Cer(m42:7)+HCO<br>O | Hex2Cer | grey | 1.6e+0 | 1.4e+0 | 1.8e+ | 1.6e+0 | 1.5e+0 | 1.2e+0 | 1.7e+0 | 1.4e+0 | 1.2e+0 | 1.3e+0 | 1.4e+0 | 1.5e+0 |
|                           |                         |         |      | 6 ±    | 6 ±    | 06 ±  | 6 ±    | 6 ±    | 6 ±    | 6 ±    | 6 ±    | 6 ±    | 6 ±    | 6 ±    | 6 ±    |
|                           |                         |         |      | 5.9e+0 | 4.8e+0 | 9.8e+ | 5.0e+0 | 7.3e+0 | 4.2e+0 | 8.1e+0 | 4.9e+0 | 3.4e+0 | 4.5e+0 | 5.2e+0 | 5.1e+0 |
|                           |                         |         |      | 5      | 5      | 05    | 5      | 5      | 5      | 5      | 5      | 5      | 5      | 5      | 5      |
| DG(16:0_20:5)+H           | DG(36:5)+H              | DG      | grey | 4.6e+0 | 5.7e+0 | 4.7e+ | 4.2e+0 | 5.4e+0 | 5.2e+0 | 4.7e+0 | 4.1e+0 | 2.8e+0 | 4.3e+0 | 5.4e+0 | 4.6e+0 |
|                           |                         |         |      | 6 ±    | 6 ±    | 06 ±  | 6 ±    | 6 ±    | 6 ±    | 6 ±    | 6 ±    | 6 ±    | 6 ±    | 6 ±    | 6 ±    |
|                           |                         |         |      | 2.4e+0 | 3.8e+0 | 3.8e+ | 3.1e+0 | 3.9e+0 | 3.0e+0 | 3.2e+0 | 2.8e+0 | 1.8e+0 | 3.2e+0 | 3.9e+0 | 5.7e+0 |
|                           |                         |         |      | 6      | 6      | 06    | 6      | 6      | 6      | 6      | 6      | 6      | 6      | 6      | 6      |
| Cer(d44:5)+H              | Cer(d44:5)+H            | Cer     | grey | 8.1e+0 | 6.7e+0 | 9.0e+ | 6.5e+0 | 7.8e+0 | 6.4e+0 | 8.3e+0 | 6.3e+0 | 5.7e+0 | 6.3e+0 | 7.8e+0 | 6.9e+0 |
|                           |                         |         |      | 7 ±    | 7 ±    | 07 ±  | 7 ±    | 7 ±    | 7 ±    | 7 ±    | 7 ±    | 7 ±    | 7 ±    | 7 ±    | 7 ±    |
|                           |                         |         |      | 3.6e+0 | 2.4e+0 | 6.0e+ | 1.8e+0 | 3.3e+0 | 2.0e+0 | 3.5e+0 | 2.1e+0 | 1.9e+0 | 2.9e+0 | 2.7e+0 | 2.3e+0 |
|                           |                         |         |      | 7      | 7      | 07    | 7      | 7      | 7      | 7      | 7      | 7      | 7      | 7      | 7      |
| AcCa(10:3)+H              | AcCa(10:3)+H            | AcCa    | grey | 3.8e+0 | 2.7e+0 | 3.9e+ | 3.3e+0 | 3.7e+0 | 2.2e+0 | 4.0e+0 | 2.9e+0 | 3.1e+0 | 2.4e+0 | 3.4e+0 | 3.2e+0 |
|                           |                         |         |      | 6 ±    | 6 ±    | 06 ±  | 6 ±    | 6 ±    | 6 ±    | 6 ±    | 6 ±    | 6 ±    | 6 ±    | 6 ±    | 6 ±    |

[illegible]

[illegible]

[illegible]

[illegible]

|                        |                        |            |           |        |        |       |        |        |        |        |        |        |        |        |        |
|------------------------|------------------------|------------|-----------|--------|--------|-------|--------|--------|--------|--------|--------|--------|--------|--------|--------|
| CerG2GNAc1(d36:3)-H    | CerG2GNAc1(d36:3)-H    | CerG2GNAc1 | turquoise | 2.1e+0 | 1.4e+0 | 2.8e+ | 1.8e+0 | 2.0e+0 | 3.2e+0 | 2.9e+0 | 2.6e+0 | 1.9e+0 | 2.0e+0 | 1.7e+0 | 2.5e+0 |
|                        |                        |            |           | 7      | 7      | 07    | 7      | 7      | 7      | 7      | 7      | 7      | 7      | 7      | 7      |
|                        |                        |            |           | 2.0e+0 | 1.8e+0 | 3.4e+ | 1.7e+0 | 1.9e+0 | 3.2e+0 | 2.8e+0 | 2.0e+0 | 1.7e+0 | 1.8e+0 | 2.6e+0 | 2.3e+0 |
|                        |                        |            |           | 6 ±    | 6 ±    | 06 ±  | 6 ±    | 6 ±    | 6 ±    | 6 ±    | 6 ±    | 6 ±    | 6 ±    | 6 ±    | 6 ±    |
|                        |                        |            |           | 1.9e+0 | 2.9e+0 | 2.7e+ | 1.6e+0 | 1.3e+0 | 4.5e+0 | 1.7e+0 | 2.0e+0 | 2.1e+0 | 2.7e+0 | 2.6e+0 | 1.6e+0 |
| CerG2GNAc1(d36:1)-H    | CerG2GNAc1(d36:1)-H    | CerG2GNAc1 | turquoise | 6      | 6      | 06    | 6      | 6      | 6      | 6      | 6      | 6      | 6      | 6      | 6      |
|                        |                        |            |           | 8.7e+0 | 7.6e+0 | 1.3e+ | 9.2e+0 | 8.7e+0 | 1.5e+0 | 1.3e+0 | 1.2e+0 | 7.4e+0 | 7.7e+0 | 9.9e+0 | 1.4e+0 |
|                        |                        |            |           | 6 ±    | 6 ±    | 07 ±  | 6 ±    | 6 ±    | 7 ±    | 7 ±    | 7 ±    | 6 ±    | 6 ±    | 6 ±    | 7 ±    |
|                        |                        |            |           | 8.4e+0 | 6.0e+0 | 1.1e+ | 8.9e+0 | 5.6e+0 | 2.0e+0 | 9.6e+0 | 1.3e+0 | 9.9e+0 | 8.0e+0 | 6.6e+0 | 1.4e+0 |
|                        |                        |            |           | 6      | 6      | 07    | 6      | 6      | 7      | 6      | 7      | 6      | 6      | 6      | 7      |
| GM3(m36:5)-H           | GM3(m36:5)-H           | GM3        | turquoise | 8.9e+0 | 8.2e+0 | 1.5e+ | 8.0e+0 | 9.0e+0 | 1.3e+0 | 1.4e+0 | 9.2e+0 | 7.5e+0 | 8.7e+0 | 1.2e+0 | 1.0e+0 |
|                        |                        |            |           | 5 ±    | 5 ±    | 06 ±  | 5 ±    | 5 ±    | 6 ±    | 6 ±    | 5 ±    | 5 ±    | 5 ±    | 6 ±    | 6 ±    |
|                        |                        |            |           | 6.7e+0 | 1.1e+0 | 1.0e+ | 6.1e+0 | 5.8e+0 | 1.4e+0 | 7.4e+0 | 7.6e+0 | 7.4e+0 | 1.0e+0 | 1.0e+0 | 6.6e+0 |
|                        |                        |            |           | 5      | 6      | 06    | 5      | 5      | 6      | 5      | 5      | 5      | 6      | 6      | 5      |
|                        |                        |            |           | 5.7e+0 | 5.2e+0 | 8.4e+ | 5.3e+0 | 5.7e+0 | 8.1e+0 | 7.8e+0 | 7.1e+0 | 4.6e+0 | 5.0e+0 | 6.5e+0 | 8.6e+0 |
| CerG2GNAc1(d38:4)+HCOO | CerG2GNAc1(d38:4)+HCOO | CerG2GNAc1 | turquoise | 6 ±    | 6 ±    | 06 ±  | 6 ±    | 6 ±    | 6 ±    | 6 ±    | 6 ±    | 6 ±    | 6 ±    | 6 ±    | 6 ±    |
|                        |                        |            |           | 4.7e+0 | 3.5e+0 | 6.0e+ | 3.2e+0 | 3.4e+0 | 8.5e+0 | 4.6e+0 | 6.2e+0 | 4.9e+0 | 4.4e+0 | 3.5e+0 | 7.1e+0 |
|                        |                        |            |           | 6      | 6      | 06    | 6      | 6      | 6      | 6      | 6      | 6      | 6      | 6      | 6      |
|                        |                        |            |           | 3.9e+0 | 3.5e+0 | 5.2e+ | 3.6e+0 | 3.8e+0 | 5.0e+0 | 5.0e+0 | 4.5e+0 | 2.9e+0 | 3.6e+0 | 3.9e+0 | 5.2e+0 |
|                        |                        |            |           | 6 ±    | 6 ±    | 06 ±  | 6 ±    | 6 ±    | 6 ±    | 6 ±    | 6 ±    | 6 ±    | 6 ±    | 6 ±    | 6 ±    |
| GM3(m38:6)+HCOO        | GM3(m38:6)+HCOO        | GM3        | turquoise | 2.6e+0 | 1.7e+0 | 2.6e+ | 1.8e+0 | 2.1e+0 | 4.4e+0 | 2.3e+0 | 3.3e+0 | 1.7e+0 | 2.3e+0 | 1.1e+0 | 2.7e+0 |
|                        |                        |            |           | 6      | 6      | 06    | 6      | 6      | 6      | 6      | 6      | 6      | 6      | 6      | 6      |
|                        |                        |            |           | 5.6e+0 | 4.3e+0 | 7.3e+ | 5.0e+0 | 5.4e+0 | 4.6e+0 | 6.1e+0 | 5.4e+0 | 4.4e+0 | 4.5e+0 | 5.6e+0 | 5.9e+0 |
|                        |                        |            |           | 6 ±    | 6 ±    | 06 ±  | 6 ±    | 6 ±    | 6 ±    | 6 ±    | 6 ±    | 6 ±    | 6 ±    | 6 ±    | 6 ±    |
|                        |                        |            |           | 1.8e+0 | 2.4e+0 | 5.2e+ | 1.8e+0 | 2.7e+0 | 2.5e+0 | 3.2e+0 | 2.2e+0 | 2.4e+0 | 2.6e+0 | 1.9e+0 | 2.5e+0 |
| GM3(d42:2)-H           | GM3(d42:2)-H           | GM3        | turquoise | 6      | 6      | 06    | 6      | 6      | 6      | 6      | 6      | 6      | 6      | 6      | 6      |
|                        |                        |            |           | 3.0e+0 | 2.5e+0 | 3.0e+ | 2.6e+0 | 3.1e+0 | 2.7e+0 | 3.0e+0 | 2.9e+0 | 2.8e+0 | 2.5e+0 | 3.5e+0 | 3.1e+0 |
|                        |                        |            |           | 7 ±    | 7 ±    | 07 ±  | 7 ±    | 7 ±    | 7 ±    | 7 ±    | 7 ±    | 7 ±    | 7 ±    | 7 ±    | 7 ±    |
|                        |                        |            |           | 1.8e+0 | 1.4e+0 | 1.8e+ | 1.5e+0 | 1.5e+0 | 1.8e+0 | 1.9e+0 | 1.4e+0 | 1.7e+0 | 1.0e+0 | 1.1e+0 | 2.1e+0 |
|                        |                        |            |           | 7      | 7      | 07    | 7      | 7      | 7      | 7      | 7      | 7      | 7      | 7      | 7      |
| PC(31:0)+H             | PC(31:0)+H             | PC         | turquoise | 9.7e+0 | 7.1e+0 | 1.1e+ | 8.4e+0 | 9.9e+0 | 8.0e+0 | 8.1e+0 | 1.0e+0 | 8.4e+0 | 7.4e+0 | 1.1e+0 | 1.0e+0 |
|                        |                        |            |           | 6 ±    | 6 ±    | 07 ±  | 6 ±    | 6 ±    | 6 ±    | 6 ±    | 7 ±    | 6 ±    | 6 ±    | 7 ±    | 7 ±    |



|                 |               |     |           |               |               |               |               |               |               |               |               |               |               |               |               |
|-----------------|---------------|-----|-----------|---------------|---------------|---------------|---------------|---------------|---------------|---------------|---------------|---------------|---------------|---------------|---------------|
| LPE(18:2)+H     | LPE(18:2)+H   | LPE | turquoise | 6.1e+0<br>6   | 3.4e+0<br>6   | 8.5e+<br>06   | 5.3e+0<br>6   | 6.0e+0<br>6   | 6.0e+0<br>6   | 3.3e+0<br>6   | 4.9e+0<br>6   | 4.9e+0<br>6   | 2.4e+0<br>6   | 4.9e+0<br>6   | 5.6e+0<br>6   |
|                 |               |     |           | 4.5e+0<br>7 ± | 4.9e+0<br>7 ± | 5.6e+<br>07 ± | 4.3e+0<br>7 ± | 4.1e+0<br>7 ± | 7.0e+0<br>7 ± | 5.1e+0<br>7 ± | 4.9e+0<br>7 ± | 4.0e+0<br>7 ± | 4.7e+0<br>7 ± | 6.4e+0<br>7 ± | 6.6e+0<br>7 ± |
|                 |               |     |           | 2.9e+0<br>7   | 4.8e+0<br>7   | 2.6e+<br>07   | 4.1e+0<br>7   | 1.5e+0<br>7   | 7.1e+0<br>7   | 2.2e+0<br>7   | 5.9e+0<br>7   | 2.2e+0<br>7   | 4.1e+0<br>7   | 3.6e+0<br>7   | 6.7e+0<br>7   |
| LPC(16:2e)+H    | LPC(16:2e)+H  | LPC | turquoise | 8.8e+0<br>6 ± | 7.9e+0<br>6 ± | 1.1e+<br>07 ± | 8.5e+0<br>6 ± | 9.1e+0<br>6 ± | 1.1e+0<br>7 ± | 1.1e+0<br>7 ± | 9.5e+0<br>6 ± | 7.7e+0<br>6 ± | 8.2e+0<br>6 ± | 9.7e+0<br>6 ± | 1.0e+0<br>7 ± |
|                 |               |     |           | 4.1e+0<br>6   | 4.1e+0<br>6   | 6.0e+<br>06   | 5.8e+0<br>6   | 6.8e+0<br>6   | 8.9e+0<br>6   | 6.0e+0<br>6   | 4.6e+0<br>6   | 6.4e+0<br>6   | 4.3e+0<br>6   | 3.8e+0<br>6   | 7.0e+0<br>6   |
| LPC(16:0)+H     | LPC(16:0)+H   | LPC | turquoise | 5.0e+0<br>9 ± | 4.0e+0<br>9 ± | 5.7e+<br>09 ± | 4.3e+0<br>9 ± | 4.9e+0<br>9 ± | 5.6e+0<br>9 ± | 6.2e+0<br>9 ± | 4.8e+0<br>9 ± | 3.9e+0<br>9 ± | 4.2e+0<br>9 ± | 5.3e+0<br>9 ± | 5.2e+0<br>9 ± |
|                 |               |     |           | 2.8e+0<br>9   | 1.7e+0<br>9   | 3.2e+<br>09   | 2.8e+0<br>9   | 2.5e+0<br>9   | 3.9e+0<br>9   | 4.4e+0<br>9   | 2.7e+0<br>9   | 2.6e+0<br>9   | 2.4e+0<br>9   | 2.6e+0<br>9   | 3.1e+0<br>9   |
| PC(8:0e_10:0)+H | PC(18:0e)+H   | PC  | turquoise | 1.5e+0<br>9 ± | 1.3e+0<br>9 ± | 1.8e+<br>09 ± | 1.5e+0<br>9 ± | 1.6e+0<br>9 ± | 1.9e+0<br>9 ± | 1.9e+0<br>9 ± | 1.8e+0<br>9 ± | 1.3e+0<br>9 ± | 1.2e+0<br>9 ± | 1.6e+0<br>9 ± | 2.0e+0<br>9 ± |
|                 |               |     |           | 1.0e+0<br>9   | 7.1e+0<br>8   | 1.0e+<br>09   | 1.0e+0<br>9   | 8.6e+0<br>8   | 1.7e+0<br>9   | 1.1e+0<br>9   | 1.5e+0<br>9   | 9.7e+0<br>8   | 7.4e+0<br>8   | 8.5e+0<br>8   | 1.4e+0<br>9   |
| WE(16:0)-H      | WE(16:0)-H    | WE  | turquoise | 4.1e+0<br>6 ± | 3.5e+0<br>6 ± | 4.8e+<br>06 ± | 4.0e+0<br>6 ± | 4.0e+0<br>6 ± | 4.1e+0<br>6 ± | 5.0e+0<br>6 ± | 4.5e+0<br>6 ± | 3.6e+0<br>6 ± | 3.3e+0<br>6 ± | 3.6e+0<br>6 ± | 4.3e+0<br>6 ± |
|                 |               |     |           | 1.6e+0<br>6   | 1.7e+0<br>6   | 2.2e+<br>06   | 1.7e+0<br>6   | 1.6e+0<br>6   | 1.9e+0<br>6   | 2.2e+0<br>6   | 2.1e+0<br>6   | 1.0e+0<br>6   | 1.2e+0<br>6   | 1.5e+0<br>6   | 2.1e+0<br>6   |
| LPC(18:2)-CH3   | LPC(18:2)-CH3 | LPC | turquoise | 2.9e+0<br>7 ± | 2.7e+0<br>7 ± | 4.0e+<br>07 ± | 2.6e+0<br>7 ± | 2.5e+0<br>7 ± | 3.3e+0<br>7 ± | 3.3e+0<br>7 ± | 3.0e+0<br>7 ± | 2.3e+0<br>7 ± | 2.5e+0<br>7 ± | 3.4e+0<br>7 ± | 3.4e+0<br>7 ± |
|                 |               |     |           | 1.9e+0<br>7   | 2.2e+0<br>7   | 3.0e+<br>07   | 2.1e+0<br>7   | 9.6e+0<br>6   | 2.5e+0<br>7   | 1.3e+0<br>7   | 2.8e+0<br>7   | 1.2e+0<br>7   | 1.9e+0<br>7   | 1.4e+0<br>7   | 2.7e+0<br>7   |
| LPC(18:0)-CH3   | LPC(18:0)-CH3 | LPC | turquoise | 2.0e+0<br>6 ± | 1.9e+0<br>6 ± | 2.6e+<br>06 ± | 2.1e+0<br>6 ± | 2.1e+0<br>6 ± | 2.3e+0<br>6 ± | 2.8e+0<br>6 ± | 2.5e+0<br>6 ± | 1.7e+0<br>6 ± | 1.7e+0<br>6 ± | 2.2e+0<br>6 ± | 3.0e+0<br>6 ± |
|                 |               |     |           | 7.8e+0<br>5   | 6.3e+0<br>5   | 1.1e+<br>06   | 9.0e+0<br>5   | 9.0e+0<br>5   | 1.4e+0<br>6   | 1.2e+0<br>6   | 1.1e+0<br>6   | 7.6e+0<br>5   | 4.9e+0<br>5   | 7.3e+0<br>5   | 2.0e+0<br>6   |
| GM3(m38:2)-2H   | GM3(m38:2)-2H | GM3 | turquoise | 4.5e+0<br>6 ± | 3.9e+0<br>6 ± | 7.0e+<br>06 ± | 4.4e+0<br>6 ± | 4.3e+0<br>6 ± | 5.1e+0<br>6 ± | 5.9e+0<br>6 ± | 4.6e+0<br>6 ± | 3.6e+0<br>6 ± | 3.6e+0<br>6 ± | 4.6e+0<br>6 ± | 5.5e+0<br>6 ± |

[illegible]

|              |              |     |           |        |        |       |        |        |        |        |        |        |        |        |        |
|--------------|--------------|-----|-----------|--------|--------|-------|--------|--------|--------|--------|--------|--------|--------|--------|--------|
|              |              |     |           | 5.5e+0 | 5.9e+0 | 8.3e+ | 5.8e+0 | 7.3e+0 | 9.3e+0 | 8.6e+0 | 7.6e+0 | 8.6e+0 | 4.7e+0 | 7.6e+0 | 8.6e+0 |
|              |              |     |           | 5      | 5      | 05    | 5      | 5      | 5      | 5      | 5      | 5      | 5      | 5      | 5      |
|              |              |     |           | 6.2e+0 | 5.7e+0 | 6.8e+ | 5.8e+0 | 6.1e+0 | 6.4e+0 | 6.2e+0 | 6.5e+0 | 5.1e+0 | 5.6e+0 | 6.5e+0 | 6.3e+0 |
| LPC(16:0)+Na | LPC(16:0)+Na | LPC | turquoise | 8 ±    | 8 ±    | 08 ±  | 8 ±    | 8 ±    | 8 ±    | 8 ±    | 8 ±    | 8 ±    | 8 ±    | 8 ±    | 8 ±    |
|              |              |     |           | 2.2e+0 | 1.6e+0 | 2.4e+ | 1.9e+0 | 1.8e+0 | 1.7e+0 | 1.8e+0 | 2.1e+0 | 1.5e+0 | 1.6e+0 | 1.9e+0 | 2.3e+0 |
|              |              |     |           | 8      | 8      | 08    | 8      | 8      | 8      | 8      | 8      | 8      | 8      | 8      | 8      |

Metabolites after log transformation are presented as mean ± SD. WGCNA, weighted gene correlation network analysis; EX+VD, vitamin D supplementation and exercise training; VD, vitamin D supplementation; EX, exercise training; Con, control group; t1, time 1 (0-week); t2, time 2(12-week); t3, time 3 (24-week); TG, triglycerols; PC, phosphatidylcholine; Cer, ceramide; SM, sphingomyelin; PE, phosphatidylethanolamine; LPC, lyso-phosphatidylcholine; DG, diacylglycerols; PS, phosphatidylserine; AcCa, acyl carnitine; HexCer/Hex2Cer, hexosyl ceramide; GM3, ganglioside, monosialo trihexosyl ceramide; PIP, phosphatidylinositol(4)phosphate; CerG3GNAc1, dihexosyl N-acetylhexosyl ceramide; WE, wax exters; PIP2, phosphatidylinositol(4,5)bisphosphate; DGDG, digalactosyl diglyceride.

**Table S6.** Different co-expression modules of lipids from WGCNA

| ID    | Time | Group | MEturquoise | MEblue   | MEgrey   |
|-------|------|-------|-------------|----------|----------|
| NO.9  | t2   | Con   | -0.14902    | -0.21164 | -0.10501 |
| NO.11 | t2   | Con   | -0.12497    | -0.17163 | 0.044051 |
| NO.7  | t2   | Con   | -0.08231    | -0.1705  | -0.07593 |
| NO.64 | t2   | Con   | -0.14548    | -0.12775 | 0.120497 |
| NO.14 | t2   | Con   | -0.07593    | -0.09396 | -0.05323 |
| NO.57 | t2   | Con   | -0.03385    | -0.06944 | -0.05637 |
| NO.42 | t2   | Con   | 0.01436     | -0.00806 | -0.00889 |
| NO.36 | t2   | Con   | 0.001078    | 0.000352 | 0.220759 |
| NO.38 | t2   | Con   | -0.00037    | 0.005865 | 0.102853 |
| NO.41 | t2   | Con   | -0.00819    | 0.025145 | -0.15752 |
| NO.20 | t2   | Con   | 0.055918    | 0.038414 | 0.051209 |
| NO.34 | t2   | Con   | -0.08257    | 0.050942 | -0.02604 |
| NO.59 | t2   | Con   | 0.039487    | 0.056244 | 0.115969 |
| NO.39 | t2   | Con   | 0.078848    | 0.151449 | -0.08364 |
| NO.56 | t2   | Con   | 0.058312    | 0.153096 | 0.071819 |
| NO.15 | t2   | EX    | 0.214057    | -0.33127 | -0.22934 |
| NO.5  | t2   | EX    | -0.12099    | -0.14307 | -0.20828 |
| NO.61 | t2   | EX    | 0.624663    | -0.09745 | -0.05146 |
| NO.4  | t2   | EX    | 0.002245    | -0.08219 | 0.030735 |
| NO.52 | t2   | EX    | 0.01043     | -0.08124 | -0.01524 |
| NO.40 | t2   | EX    | -0.02237    | -0.03985 | -0.0574  |
| NO.63 | t2   | EX    | -0.08475    | -0.00143 | -0.26457 |
| NO.18 | t2   | EX    | 0.052397    | 0.00438  | 0.021825 |
| NO.48 | t2   | EX    | 0.050366    | 0.009003 | -0.02017 |
| NO.27 | t2   | EX    | 0.029604    | 0.014806 | 0.053752 |
| NO.13 | t2   | EX    | 0.04413     | 0.05796  | 0.144222 |
| NO.49 | t2   | EX    | 0.02013     | 0.07619  | 0.01099  |
| NO.25 | t2   | EX    | 0.167324    | 0.203141 | 0.270766 |
| NO.43 | t2   | EX    | 0.27969     | 0.309746 | -0.06524 |
| NO.16 | t2   | VD    | -0.25667    | -0.13338 | -0.2095  |
| NO.54 | t2   | VD    | -0.29076    | 0.157854 | 0.049957 |
| NO.50 | t2   | VD    | -0.05998    | -0.11207 | 0.129471 |
| NO.33 | t2   | VD    | -0.12463    | -0.09882 | 0.122718 |
| NO.60 | t2   | VD    | -0.05812    | -0.0665  | -0.04066 |
| NO.62 | t2   | VD    | -0.14805    | -0.05179 | 0.365859 |
| NO.1  | t2   | VD    | 0.01411     | 0.0027   | -0.11476 |
| NO.45 | t2   | VD    | 0.031488    | 0.084735 | 0.013738 |
| NO.47 | t2   | VD    | 0.029508    | 0.089646 | -0.11039 |
| NO.26 | t2   | VD    | -0.01676    | 0.125403 | 0.225281 |
| NO.17 | t2   | VD    | 0.045495    | 0.11715  | -0.14742 |
| NO.22 | t2   | VD    | -0.03488    | 0.121818 | 0.126183 |
| NO.6  | t2   | VD    | 0.103333    | 0.136579 | -0.01837 |
| NO.19 | t2   | VD    | 0.093501    | 0.172567 | 0.01401  |
| NO.31 | t2   | VD    | 0.146504    | 0.219633 | -0.36501 |
| NO.28 | t2   | EX+VD | -0.09457    | -0.10412 | -0.03346 |
| NO.29 | t2   | EX+VD | 0.018104    | 0.03054  | -0.05845 |
| NO.10 | t2   | EX+VD | -0.06507    | 0.028361 | 0.015147 |

|       |    |       |          |          |          |
|-------|----|-------|----------|----------|----------|
| NO.2  | t2 | EX+VD | -0.01957 | 0.005179 | -0.04044 |
| NO.58 | t2 | EX+VD | -0.01884 | 0.003571 | 0.208005 |
| NO.55 | t2 | EX+VD | 0.008954 | 0.000775 | -0.12782 |
| NO.21 | t2 | EX+VD | 0.001452 | 0.005407 | -0.0147  |
| NO.12 | t2 | EX+VD | 0.085247 | 0.132154 | 0.103314 |
| NO.51 | t2 | EX+VD | 0.011978 | 0.05062  | 0.095735 |
| NO.24 | t2 | EX+VD | 0.100242 | 0.064908 | 0.057968 |
| NO.65 | t2 | EX+VD | 0.204589 | 0.181325 | 0.0036   |
| NO.53 | t2 | EX+VD | 0.102646 | 0.187004 | -0.02311 |
| NO.23 | t2 | EX+VD | 0.04235  | 0.196406 | -0.11416 |
| NO.32 | t2 | EX+VD | 0.195223 | 0.2017   | 0.086285 |
| NO.44 | t2 | EX+VD | 0.124677 | 0.216248 | 0.019867 |

WGCNA, weighted gene correlation network analysis; EX+VD, vitamin D supplementation and exercise training; VD, vitamin D supplementation; EX, exercise training; Con, control group; t1, time 1 (0-week); t2, time 2 (12-week).
